# Supplementary material for: Abnormal retinal development associated with FRMD7 mutations
Source: PubMed Central journal article supplement (PMC4082370; doi:10.1093/hmg/ddu122), 2014-03-31
Supplement: supp_ddu122_ddu122supp_table2.pdf [file supp_ddu122_ddu122supp_table2.pdf]

| Patient ID | Gender | Age | DNA variant | Aminoacid variant | Visual acuity (LogMAR) | Foveal Pit present | Nystagmus Present | Foveal Pit depth | Central Macular Thickness | OS    | Continuation of Inner retinal layers posterior to foveola | Reference for variant |
|------------|--------|-----|-------------|-------------------|------------------------|--------------------|-------------------|------------------|---------------------------|-------|-----------------------------------------------------------|-----------------------|
| NYS597     | M      | 11  | c.205+2 T>G |                   | 0.18                   | Yes                | Yes               | 128.7            | 197.0                     | 48.70 | No                                                        | 1                     |
| NYS1337    | M      | 46  | c.205+2 T>G |                   | 0.18                   | Yes                | Yes               | 117.0            | 200.9                     | 37.05 | No                                                        | 1                     |
| NYS612     | F      | 9   | c.205+2 T>G |                   | 0.18                   | Yes                | Yes               | 120.9            | 198.9                     | 44.85 | No                                                        | 1                     |
| NYS374     | F      | 16  | c.205+2 T>G |                   | 0.30                   | Yes                | Yes               | 60.5             | 253.5                     | 39.00 | Yes                                                       | 1                     |
| NYS1766    | M      | 41  | c.252G>A    | p.V84V            | 0.18                   | Yes                | Yes               | 119.0            | 206.7                     | 42.90 | No                                                        | 1                     |
| NYS970     | F      | 15  | c.796G>C    | p.A266P           | 0.00                   | Yes                | Yes               | 122.9            | 181.4                     | 40.95 | No                                                        | 1, 2                  |
| NYS1485    | F      | 14  | c.796G>C    | p.A266P           | 0.20                   | Yes                | Yes               | 74.1             | 212.6                     | 40.95 | Yes                                                       | 1, 2                  |
| NYS1469    | M      | 50  | c.796G>C    | p.A266P           | 0.10                   | Yes                | Yes               | 99.5             | 200.9                     | 46.80 | No                                                        | 1, 2                  |
| NYS120     | F      | 46  | c.162+5 G>A |                   | 0.18                   | Yes                | Yes               | 119.0            | 195.0                     | 40.95 | No                                                        | 1                     |
| NYS565     | M      | 22  | c.162+5 G>A |                   | 0.18                   | Yes                | Yes               | 128.7            | 206.7                     | 46.80 | No                                                        | 1                     |
| NYS1078    | M      | 44  | c.1003C>T   | p.R335X           | 0.18                   | Yes                | Yes               | 126.8            | 197.0                     | 48.75 | No                                                        | 1, 2, 3               |
| NYS1177    | M      | 48  | c.1003C>T   | p.R335X           | 0.20                   | Yes                | Yes               | 109.2            | 187.2                     | 44.85 | No                                                        | 1, 2, 3               |
| NYS942     | F      | 10  | c.1003C>T   | p.R335X           | 0.30                   | Yes                | Yes               | 93.6             | 224.3                     | 40.95 | No                                                        | 1, 2, 3               |
| NYS617     | F      | 50  | c.812G>A    | p.C271Y           | 0.40                   | Yes                | Yes               | 52.7             | 257.4                     | 40.95 | Yes                                                       | 1, 2                  |
| NYS1664    | M      | 21  | c.812G>A    | p.C271Y           | 0.18                   | Yes                | Yes               | 130.7            | 179.4                     | 39.00 | No                                                        | 1, 2                  |
| NYS1585    | F      | 51  | c.812G>A    | p.C271Y           | 0.60                   | Yes                | Yes               | 52.7             | 237.9                     | 35.10 | Yes                                                       | 1, 2                  |
| NYS245     | M      | 71  | c.812G>A    | p.C271Y           | 0.40                   | Yes                | Yes               | 81.9             | 214.5                     | 35.10 | Yes                                                       | 1, 2                  |
| NYS673     | F      | 28  | c.812G>A    | p.C271Y           | 0.10                   | Yes                | Yes               | 113.1            | 195.0                     | 46.80 | No                                                        | 1, 2                  |
| NYS1410    | M      | 38  | c.661A>G    | p.N221D           | 0.00                   | Yes                | Yes               | 113.1            | 197.0                     | 42.90 | No                                                        | 1                     |
| NYS105     | F      | 40  | c.1019C>T   | p.S340L           | 0.00                   | Yes                | Yes               | 119.0            | 183.3                     | 37.05 | No                                                        | 1, 2                  |
| NYS36      | F      | 44  | c.71G>A     | p.G24E            | -0.10                  | Yes                | Yes               | 134.6            | 169.7                     | 40.95 | No                                                        | 1                     |
| NYS1436    | M      | 16  | c.71G>A     | p.G24E            | 0.20                   | Yes                | Yes               | 130.7            | 171.6                     | 37.05 | No                                                        | 1                     |
| NYS1734    | M      | 56  | c.1003C>T   | p.R335X           | 0.30                   | Yes                | Yes               | 27.3             | 230.1                     | 35.00 | Yes                                                       | 1, 2, 3               |
| NYS107     | F      | 35  | c.796G>C    | p.A266P           | 0.18                   | Yes                | Yes               | 44.9             | 239.9                     | 35.10 | Yes                                                       | 1, 2                  |
| NYS1965    | M      | 34  | c.58-1G>A   |                   | 0.16                   | Yes                | Yes               | 150.2            | 177.5                     | 44.85 | No                                                        | 2                     |
| NYS1561    | F      | 54  | c.983A>G    | p.Y328C           | 0.18                   | Yes                | Yes               | 154.1            | 165.8                     | 40.95 | No                                                        | Novel                 |
| NYS1537    | F      | 30  | c.983A>G    | p.Y328C           | 0.10                   | Yes                | Yes               | 113.1            | 187.2                     | 44.85 | No                                                        | Novel                 |
| NYS131     | M      | 30  | c.47T>C     | p.F16S            | 0.20                   | Yes                | Yes               | 132.6            | 198.9                     | 40.95 | No                                                        | 2                     |

|         |   |    |              |              |      |     |     |       |       |       |     |       |
|---------|---|----|--------------|--------------|------|-----|-----|-------|-------|-------|-----|-------|
| NYS148  | M | 7  | c.660delC    | p.I220IfsX12 | 0.20 | Yes | Yes | 140.4 | 152.1 | 39.00 | No  | Novel |
| NYS412  | F | 8  | c.910C>T     | p.R304RX     | 0.12 | Yes | Yes | 126.8 | 195.0 | 42.90 | No  | 4     |
| NYS605  | M | 43 | c.796G>C     | p.A266P      | 0.18 | Yes | Yes | 109.2 | 173.6 | 39.00 | No  | 1, 2  |
| NYS875  | M | 35 | c.796G>C     | p.A266P      | 0.18 | Yes | Yes | 148.2 | 179.4 | 48.75 | No  | 1, 2  |
| NYS1324 | M | 58 | c.673T>C     | p.W225R      | 0.24 | Yes | Yes | 138.5 | 191.1 | 42.90 | No  | Novel |
| NYS175  | F | 24 | c.673T>C     | p.W225R      | 0.10 | Yes | Yes | 150.2 | 179.4 | 48.75 | No  | Novel |
| NYS772  | M | 79 | c.206-5T>A   |              | 0.34 | Yes | Yes | 81.9  | 214.5 | 37.05 | Yes | Novel |
| NYS301  | F | 38 | c.206-5T>A   |              | 0.30 | Yes | Yes | 66.3  | 251.6 | 40.95 | Yes | Novel |
| NYS423  | M | 25 | c.782G>A     | p.R261Q      | 0.16 | Yes | Yes | 124.8 | 183.3 | 46.80 | No  | 4     |
| NYS1040 | F | 30 | c.782G>A     | p.R261Q      | 0.28 | Yes | Yes | 122.9 | 185.3 | 44.85 | No  | 4     |
| NYS1066 | F | 28 | c.824A>G     | p.H275R      | 0.20 | Yes | Yes | 148.2 | 195.0 | 44.85 | No  | Novel |
| NYS1182 | F | 41 | c.824A>G     | p.H275R      | 0.28 | Yes | Yes | 126.8 | 202.8 | 46.80 | No  | Novel |
| NYS7    | M | 50 | c.285-118C>T |              | 0.30 | Yes | Yes | 105.3 | 230.1 | 40.95 | Yes | Novel |
| NYS134  | M | 62 | c.154G>T     | p.G52X       | 0.18 | Yes | Yes | 132.6 | 198.9 | 39.00 | No  | Novel |
| NYS207  | M | 27 | c.811T>A     | p.C271S      | 0.00 | Yes | Yes | 142.4 | 181.4 | 39.00 | No  | 2     |
| NYS1086 | M | 24 | c.285-118C>T |              | 0.38 | Yes | Yes | 52.7  | 257.4 | 37.05 | Yes | Novel |
| NYS1211 | M | 12 | c.285-118C>T |              | 0.30 | Yes | Yes | 56.6  | 237.9 | 40.95 | Yes | Novel |

#### References:

1. Tarpey P., Thomas S., Sarvanathan N., Mallya U., Ligo S., Talbot C.J., Roberts E.O., Awan M., Surendran M., McLean R.J. *et al.* (2006) Mutations in FRMD7, a newly identified member of the FERM family, cause X-linked idiopathic congenital nystagmus. *Nat. Genet.*, **38**, 1242-1244.
2. Thomas M.G., Crosier M., Lindsay S., Kumar A., Thomas S., Araki M., Talbot C.J., McLean R.J., Surendran M., Taylor K. *et al.* (2011) The clinical and molecular genetic features of idiopathic infantile periodic alternating nystagmus. *Brain*, **134**, 892-902.
3. Zhang Q., Xiao X., Li S. and Guo X. (2007) FRMD7 mutations in chinese families with X-linked congenital motor nystagmus. *Mol. Vis.*, **13**, 1375-1378.
4. Li N., Wang L., Cui L., Zhang L., Dai S., Li H., Chen X., Zhu L., Hejtmanck J.F. and Zhao K. (2008) Five novel mutations of the FRMD7 gene in chinese families with X-linked infantile nystagmus. *Mol. Vis.*, **14**, 733-738.
